# Supplementary material for: Research on the Characteristics and Kinetics of the Pyrolysis Process and Products Generation of Jimsar (China) Oil Shale Using TG-FTIR
Source: MDPI journal article supplement (doi:10.3390/pr11051535), 2023-05-17
Supplement: s1 [file s1]

# Research on the Characteristics and Kinetics of the Pyrolysis Process and Products Generation of Jimsar (China) Oil Shale Using TG-FTIR

Hao Lu, Luwei Pan \*, Pingan Chen and Ting Liu

The State Key Laboratory of Refractories and Metallurgy, Wuhan University of Science and Technology, No.947 Heping Avenue, Qingshan District, Wuhan 430081, China; luhao1227@126.com (H.L.); chenpingan1203@163.com (P.C.); liuting666@wust.edu.cn (T.L.)

\* Correspondence: panluwei@wust.edu.cn

## Part A

**Table S1.** Differential and integral expressions for different reaction models [1-4].

| Reaction model                    | Differential form $f(\alpha)$                                    | Integral form $g(\alpha)$               |
|-----------------------------------|------------------------------------------------------------------|-----------------------------------------|
| <i>Chemical Reaction models</i>   |                                                                  |                                         |
| First order, F1                   | $1 - \alpha$                                                     | $-\ln(1 - \alpha)$                      |
| Second order, F2                  | $(1 - \alpha)^2$                                                 | $(1 - \alpha)^{-1} - 1$                 |
| Third order, F3                   | $(1 - \alpha)^3$                                                 | $\left[(1 - \alpha)^{-2} - 1\right]/2$  |
| <i>Diffusion models</i>           |                                                                  |                                         |
| 1-D Diffusion, D1                 | $1/2\alpha$                                                      | $\alpha^2$                              |
| 2-D Diffusion, D2                 | $-1/\ln(1 - \alpha)$                                             | $(1 - \alpha)\ln(1 - \alpha) + \alpha$  |
| 3-D Diffusion-Jander, D3          | $3/2(1 - \alpha)^{2/3} \left[1 - (1 - \alpha)^{1/3}\right]^{-1}$ | $\left[1 - (1 - \alpha)^{1/3}\right]^2$ |
| 3-D Diffusion-Ginstling, D4       | $3/2 \left[(1 - \alpha)^{-1/3} - 1\right]^{-1}$                  | $1 - 2\alpha/3 - (1 - \alpha)^{2/3}$    |
| <i>Nucleation and growth</i>      |                                                                  |                                         |
| Avrami-Erofeev, A2                | $2(1 - \alpha) \left[-\ln(1 - \alpha)\right]^{1/2}$              | $\left[-\ln(1 - \alpha)\right]^{1/2}$   |
| Avrami-Erofeev, A3                | $3(1 - \alpha) \left[-\ln(1 - \alpha)\right]^{2/3}$              | $\left[-\ln(1 - \alpha)\right]^{1/3}$   |
| Avrami-Erofeev, A4                | $4(1 - \alpha) \left[-\ln(1 - \alpha)\right]^{3/4}$              | $\left[-\ln(1 - \alpha)\right]^{1/4}$   |
| <i>Phase interfacial reaction</i> |                                                                  |                                         |
| Contraction Area, R2              | $2(1 - \alpha)^{1/2}$                                            | $1 - (1 - \alpha)^{1/2}$                |
| Contraction Volume, R3            | $3(1 - \alpha)^{2/3}$                                            | $1 - (1 - \alpha)^{1/3}$                |
| <i>Power law</i>                  |                                                                  |                                         |
| Power Law, P2/3                   | $(2/3)\alpha^{-1/2}$                                             | $\alpha^{3/2}$                          |

Note: The reaction model in this study is also applicable to the generation model of pyrolysis products.

**Table S2.** Absorption bands of pyrolysis products [1, 5–7].

| Functional Groups                    | Wavenumber (cm <sup>-1</sup> )                                                                          |
|--------------------------------------|---------------------------------------------------------------------------------------------------------|
| CH <sub>4</sub>                      | 3018                                                                                                    |
| CO                                   | 2240–2060                                                                                               |
| CO <sub>2</sub>                      | 2400–2240, 780–560                                                                                      |
| SO <sub>2</sub>                      | 1374                                                                                                    |
| R <sub>2</sub> -sym –CH <sub>2</sub> | 2860                                                                                                    |
| asym R <sub>2</sub> –CH <sub>2</sub> | 2930                                                                                                    |
| asym R–CH <sub>3</sub>               | 2960                                                                                                    |
| O–H stretching vibration             | 4000–3500                                                                                               |
| C–H stretching vibration             | 3100–3000 (adjacent to a double bond or aromatic ring), 3000–2850 (aliphatic compounds)                 |
| C=O stretching vibration             | 1850–1600 (carbonyl compounds: ketone, acid, aldehyde, ester, acylamide, acyl chloride, estolide, etc.) |
| C=C stretching vibration             | 1600–1420 (aromatic compounds)                                                                          |
| S=O stretching vibration             | 1420–1300 (sulfur–oxygen compounds: sulfones, sulphoxides, etc.)                                        |
| C–H stretching vibration             | 1500–1300, 840–1100 (saturated aliphatic hydrocarbons)                                                  |
|                                      | 750–600 (aromatic rings and unsaturated aliphatic hydrocarbons)                                         |

**Table S3.** Kinetic parameters of the functional groups represented at 2180 cm<sup>-1</sup> wavenumber for different reaction models and heating rates.

| Generation models | Heating Rates (K/min) | 573.15–873.15 (K)       |                |                                       | 873.15–1073.15 (K)      |                |                                       |
|-------------------|-----------------------|-------------------------|----------------|---------------------------------------|-------------------------|----------------|---------------------------------------|
|                   |                       | $E_{\alpha_G}$ (kJ/mol) | R <sup>2</sup> | $\ln A_{\alpha_G}$ (s <sup>-1</sup> ) | $E_{\alpha_G}$ (kJ/mol) | R <sup>2</sup> | $\ln A_{\alpha_G}$ (s <sup>-1</sup> ) |
| F1                | 20                    | 81.725                  | 0.873          | 12.165                                | 371.650                 | 0.997          | 45.902                                |
|                   | 30                    | 65.814                  | 0.900          | 10.052                                | 270.255                 | 0.992          | 32.725                                |
|                   | 40                    | 185.377                 | 0.880          | 28.963                                | 323.309                 | 0.999          | 38.420                                |
| F2                | 20                    | 122.607                 | 0.944          | 19.877                                | 519.790                 | 0.963          | 65.235                                |
|                   | 30                    | 93.380                  | 0.827          | 15.615                                | 377.554                 | 0.944          | 46.734                                |
|                   | 40                    | 274.125                 | 0.959          | 43.749                                | 454.997                 | 0.974          | 54.930                                |
| F3                | 20                    | 173.850                 | 0.961          | 29.348                                | 703.183                 | 0.913          | 89.025                                |
|                   | 30                    | 127.327                 | 0.757          | 22.319                                | 510.259                 | 0.886          | 63.915                                |
|                   | 40                    | 385.561                 | 0.987          | 62.125                                | 618.231                 | 0.929          | 75.247                                |
| D1                | 20                    | 118.850                 | 0.778          | 17.458                                | 546.550                 | 0.983          | 66.870                                |
|                   | 30                    | 102.920                 | 0.944          | 15.585                                | 402.310                 | 0.993          | 48.079                                |
|                   | 40                    | 261.090                 | 0.768          | 39.895                                | 474.920                 | 0.975          | 55.584                                |
| D2                | 20                    | 134.080                 | 0.815          | 19.656                                | 605.020                 | 0.993          | 73.814                                |
|                   | 30                    | 114.030                 | 0.940          | 17.129                                | 444.810                 | 0.998          | 52.936                                |
|                   | 40                    | 293.850                 | 0.807          | 44.685                                | 526.601                 | 0.988          | 61.378                                |
| D3                | 20                    | 153.940                 | 0.857          | 21.871                                | 679.190                 | 0.998          | 81.957                                |
|                   | 30                    | 127.970                 | 0.929          | 18.398                                | 498.610                 | 0.998          | 58.423                                |
|                   | 40                    | 336.780                 | 0.998          | 50.310                                | 592.330                 | 0.997          | 68.083                                |
| D4                | 20                    | 140.595                 | 0.831          | 19.372                                | 629.410                 | 0.995          | 75.482                                |

|      |    |         |       |        |         |       |        |
|------|----|---------|-------|--------|---------|-------|--------|
| A2   | 30 | 118.615 | 0.937 | 16.539 | 462.499 | 0.999 | 53.733 |
|      | 40 | 307.924 | 0.823 | 45.521 | 548.207 | 0.992 | 62.574 |
|      | 20 | 34.792  | 0.829 | 3.726  | 177.856 | 0.997 | 21.200 |
|      | 30 | 27.232  | 0.862 | 2.803  | 127.055 | 0.991 | 14.626 |
|      | 40 | 86.253  | 0.863 | 12.917 | 153.293 | 0.999 | 17.678 |
| A3   | 20 | 19.147  | 0.761 | 0.604  | 113.258 | 0.997 | 12.760 |
|      | 30 | 14.372  | 0.798 | 0.039  | 79.322  | 0.990 | 8.371  |
|      | 40 | 53.211  | 0.842 | 7.340  | 96.621  | 0.999 | 10.553 |
| A4   | 20 | 11.325  | 0.654 | -1.187 | 80.959  | 0.997 | 8.431  |
|      | 30 | 7.942   | 0.682 | -1.611 | 55.455  | 0.989 | 5.123  |
|      | 40 | 36.690  | 0.817 | 4.419  | 68.285  | 0.999 | 6.873  |
| R2   | 20 | 66.019  | 0.811 | 8.430  | 313.382 | 0.996 | 37.552 |
|      | 30 | 54.879  | 0.923 | 7.096  | 227.996 | 0.999 | 26.465 |
|      | 40 | 151.403 | 0.818 | 22.540 | 271.636 | 0.993 | 31.194 |
| R3   | 20 | 70.901  | 0.834 | 8.976  | 331.626 | 0.998 | 39.549 |
|      | 30 | 58.312  | 0.917 | 7.406  | 241.233 | 0.998 | 27.809 |
|      | 40 | 161.952 | 0.840 | 23.918 | 287.803 | 0.997 | 32.838 |
| P2/3 | 20 | 86.104  | 0.765 | 12.115 | 405.928 | 0.982 | 49.443 |
|      | 30 | 74.350  | 0.940 | 10.807 | 297.698 | 0.993 | 35.365 |
|      | 40 | 192.600 | 0.762 | 29.304 | 352.010 | 0.975 | 41.092 |

**Table S4.** Kinetic parameters of the functional groups represented at 2358 cm<sup>-1</sup> wavenumber for different reaction models and heating rates.

| Generation models | Heating Rates (K/min) | 573.15–873.15 (K)       |                |                                       | 873.15–1073.15 (K)      |                |                                       |
|-------------------|-----------------------|-------------------------|----------------|---------------------------------------|-------------------------|----------------|---------------------------------------|
|                   |                       | $E_{\alpha_G}$ (kJ/mol) | R <sup>2</sup> | $\ln A_{\alpha_G}$ (s <sup>-1</sup> ) | $E_{\alpha_G}$ (kJ/mol) | R <sup>2</sup> | $\ln A_{\alpha_G}$ (s <sup>-1</sup> ) |
| F1                | 20                    | 130.913                 | 0.980          | 18.525                                | 321.858                 | 0.998          | 39.620                                |
|                   | 30                    | 122.398                 | 0.995          | 17.572                                | 295.070                 | 0.999          | 35.780                                |
|                   | 40                    | 181.668                 | 0.980          | 26.400                                | 286.259                 | 0.998          | 34.078                                |
| F2                | 20                    | 189.403                 | 0.988          | 28.196                                | 451.313                 | 0.966          | 56.648                                |
|                   | 30                    | 176.209                 | 0.986          | 26.531                                | 414.634                 | 0.967          | 51.267                                |
|                   | 40                    | 253.771                 | 0.924          | 37.793                                | 402.076                 | 0.964          | 48.766                                |
| F3                | 20                    | 262.240                 | 0.965          | 40.072                                | 611.628                 | 0.917          | 77.597                                |
|                   | 30                    | 243.080                 | 0.951          | 37.499                                | 562.735                 | 0.919          | 70.304                                |
|                   | 40                    | 342.881                 | 0.861          | 51.732                                | 545.497                 | 0.914          | 66.814                                |
| D1                | 20                    | 192.370                 | 0.922          | 26.899                                | 473.930                 | 0.982          | 57.772                                |
|                   | 30                    | 181.520                 | 0.952          | 25.598                                | 434.980                 | 0.981          | 52.051                                |
|                   | 40                    | 272.930                 | 0.993          | 38.915                                | 423.020                 | 0.984          | 49.563                                |
| D2                | 20                    | 214.860                 | 0.945          | 29.934                                | 524.950                 | 0.992          | 63.793                                |
|                   | 30                    | 202.400                 | 0.971          | 28.392                                | 482.050                 | 0.991          | 57.458                                |
|                   | 40                    | 301.570                 | 0.995          | 42.749                                | 468.660                 | 0.994          | 54.666                                |
| D3                | 20                    | 243.750                 | 0.968          | 33.176                                | 589.710                 | 0.999          | 70.779                                |
|                   | 30                    | 229.100                 | 0.987          | 31.300                                | 541.820                 | 0.999          | 63.667                                |
|                   | 40                    | 337.770                 | 0.991          | 46.931                                | 526.590                 | 0.999          | 60.477                                |
| D4                | 20                    | 224.352                 | 0.954          | 29.992                                | 546.239                 | 0.995          | 65.082                                |
|                   | 30                    | 211.174                 | 0.977          | 28.339                                | 501.702                 | 0.995          | 58.493                                |
|                   | 40                    | 313.474                 | 0.994          | 43.116                                | 487.701                 | 0.996          | 55.570                                |
| A2                | 20                    | 58.835                  | 0.975          | 7.115                                 | 152.979                 | 0.998          | 17.982                                |
|                   | 30                    | 54.595                  | 0.993          | 6.800                                 | 139.421                 | 0.999          | 16.195                                |
|                   | 40                    | 84.094                  | 0.977          | 11.571                                | 134.824                 | 0.998          | 15.447                                |
| A3                | 20                    | 34.809                  | 0.967          | 3.049                                 | 96.686                  | 0.998          | 10.558                                |

|      |    |         |       |        |         |       |        |
|------|----|---------|-------|--------|---------|-------|--------|
|      | 30 | 31.994  | 0.991 | 2.944  | 87.538  | 0.998 | 9.449  |
|      | 40 | 51.570  | 0.973 | 6.397  | 84.346  | 0.998 | 9.018  |
|      | 20 | 22.796  | 0.957 | 0.857  | 68.540  | 0.998 | 6.733  |
| A4   | 30 | 20.694  | 0.987 | 0.847  | 61.596  | 0.998 | 5.962  |
|      | 40 | 35.307  | 0.969 | 3.675  | 59.107  | 0.998 | 5.683  |
|      | 20 | 108.151 | 0.953 | 14.005 | 270.973 | 0.996 | 32.176 |
| R2   | 30 | 101.381 | 0.977 | 13.319 | 248.095 | 0.996 | 28.947 |
|      | 40 | 153.239 | 0.993 | 21.162 | 240.737 | 0.997 | 27.556 |
|      | 20 | 115.255 | 0.964 | 14.799 | 286.903 | 0.998 | 33.889 |
| R3   | 30 | 107.947 | 0.985 | 14.032 | 262.798 | 0.998 | 30.470 |
|      | 40 | 162.147 | 0.990 | 22.184 | 254.987 | 0.999 | 28.979 |
|      | 20 | 140.970 | 0.919 | 19.284 | 351.474 | 0.981 | 42.584 |
| P2/3 | 30 | 132.839 | 0.949 | 18.397 | 322.182 | 0.980 | 38.361 |
|      | 40 | 201.329 | 0.993 | 28.555 | 313.109 | 0.983 | 36.551 |

**Table S5.** Kinetic parameters of the functional groups represented at 1462 cm<sup>−1</sup> wavenumber for different reaction models and heating rates.

| Generation models | Heating Rates (K/min) | 573.15–873.15 (K)       |                |                                       |
|-------------------|-----------------------|-------------------------|----------------|---------------------------------------|
|                   |                       | $E_{\alpha_G}$ (kJ/mol) | R <sup>2</sup> | $\ln A_{\alpha_G}$ (s <sup>−1</sup> ) |
| F1                | 20                    | 176.168                 | 0.963          | 29.085                                |
|                   | 30                    | 146.243                 | 0.881          | 23.828                                |
|                   | 40                    | 279.998                 | 0.982          | 44.854                                |
| F2                | 20                    | 253.215                 | 0.978          | 42.953                                |
|                   | 30                    | 217.160                 | 0.962          | 36.500                                |
|                   | 40                    | 400.341                 | 0.999          | 64.823                                |
| F3                | 20                    | 349.352                 | 0.961          | 60.090                                |
|                   | 30                    | 306.188                 | 0.991          | 52.219                                |
|                   | 40                    | 550.360                 | 0.982          | 89.559                                |
| D1                | 20                    | 256.080                 | 0.910          | 41.686                                |
|                   | 30                    | 206.690                 | 0.770          | 32.949                                |
|                   | 40                    | 403.070                 | 0.920          | 63.505                                |
| D2                | 20                    | 285.320                 | 0.930          | 46.275                                |
|                   | 30                    | 232.890                 | 0.810          | 36.964                                |
|                   | 40                    | 449.060                 | 0.940          | 70.456                                |
| D3                | 20                    | 323.110                 | 0.950          | 51.541                                |
|                   | 30                    | 267.200                 | 0.850          | 41.569                                |
|                   | 40                    | 508.290                 | 0.970          | 78.758                                |
| D4                | 20                    | 297.723                 | 0.936          | 46.996                                |
|                   | 30                    | 244.135                 | 0.824          | 37.462                                |
|                   | 40                    | 468.504                 | 0.952          | 72.173                                |
| A2                | 20                    | 82.170                  | 0.957          | 12.692                                |
|                   | 30                    | 67.044                  | 0.860          | 10.127                                |
|                   | 40                    | 133.708                 | 0.980          | 21.115                                |
| A3                | 20                    | 50.838                  | 0.950          | 7.001                                 |
|                   | 30                    | 40.645                  | 0.834          | 5.319                                 |
|                   | 40                    | 84.945                  | 0.978          | 12.996                                |
| A4                | 20                    | 35.171                  | 0.941          | 4.027                                 |
|                   | 30                    | 27.445                  | 0.800          | 2.773                                 |
|                   | 40                    | 60.564                  | 0.976          | 8.824                                 |
| R2                | 20                    | 146.349                 | 0.936          | 22.964                                |

|      |    |         |       |        |
|------|----|---------|-------|--------|
| R3   | 30 | 119.089 | 0.817 | 18.206 |
|      | 40 | 233.290 | 0.954 | 36.350 |
|      | 20 | 155.639 | 0.946 | 24.255 |
|      | 30 | 127.520 | 0.840 | 19.337 |
|      | 40 | 247.855 | 0.965 | 38.387 |
| P2/3 | 20 | 189.103 | 0.904 | 30.510 |
|      | 30 | 151.981 | 0.760 | 23.989 |
|      | 40 | 299.160 | 0.917 | 47.137 |

**Table S6.** Kinetic parameters of the functional groups represented at 2930 cm<sup>-1</sup> wavenumber for different reaction models and heating rates.

| Generation models | Heating Rates (K/min) | 573.15–873.15 (K)       |                |                                       |
|-------------------|-----------------------|-------------------------|----------------|---------------------------------------|
|                   |                       | $E_{\alpha_G}$ (kJ/mol) | R <sup>2</sup> | $\ln A_{\alpha_G}$ (s <sup>-1</sup> ) |
| F1                | 20                    | 238.891                 | 0.981          | 39.994                                |
|                   | 30                    | 215.671                 | 0.993          | 36.347                                |
|                   | 40                    | 263.618                 | 0.974          | 42.235                                |
| F2                | 20                    | 342.060                 | 0.998          | 58.274                                |
|                   | 30                    | 307.159                 | 0.993          | 52.637                                |
|                   | 40                    | 378.577                 | 0.999          | 61.371                                |
| F3                | 20                    | 470.689                 | 0.981          | 80.903                                |
|                   | 30                    | 421.001                 | 0.966          | 72.749                                |
|                   | 40                    | 522.023                 | 0.988          | 85.085                                |
| D1                | 20                    | 344.400                 | 0.920          | 56.916                                |
|                   | 30                    | 313.680                 | 0.940          | 52.000                                |
|                   | 40                    | 378.330                 | 0.900          | 59.571                                |
| D2                | 20                    | 383.780                 | 0.940          | 63.214                                |
|                   | 30                    | 348.930                 | 0.960          | 57.594                                |
|                   | 40                    | 348.930                 | 0.960          | 57.594                                |
| D3                | 20                    | 434.530                 | 0.970          | 70.677                                |
|                   | 30                    | 394.150                 | 0.980          | 64.113                                |
|                   | 40                    | 478.500                 | 0.960          | 74.040                                |
| D4                | 20                    | 400.436                 | 0.950          | 64.655                                |
|                   | 30                    | 363.779                 | 0.971          | 58.728                                |
|                   | 40                    | 440.583                 | 0.939          | 67.746                                |
| A2                | 20                    | 113.529                 | 0.978          | 18.316                                |
|                   | 30                    | 101.926                 | 0.992          | 16.643                                |
|                   | 40                    | 125.519                 | 0.971          | 19.774                                |
| A3                | 20                    | 71.742                  | 0.976          | 10.879                                |
|                   | 30                    | 64.011                  | 0.991          | 9.857                                 |
|                   | 40                    | 79.486                  | 0.968          | 12.078                                |
| A4                | 20                    | 50.848                  | 0.973          | 7.046                                 |
|                   | 30                    | 45.054                  | 0.989          | 6.345                                 |
|                   | 40                    | 56.469                  | 0.964          | 8.114                                 |
| R2                | 20                    | 198.867                 | 0.952          | 32.149                                |
|                   | 30                    | 180.044                 | 0.973          | 29.252                                |
|                   | 40                    | 219.082                 | 0.941          | 34.066                                |
| R3                | 20                    | 211.346                 | 0.963          | 33.979                                |
|                   | 30                    | 191.165                 | 0.981          | 30.850                                |
|                   | 40                    | 232.962                 | 0.953          | 35.996                                |
| P2/3              | 20                    | 255.340                 | 0.916          | 42.011                                |

|    |         |       |        |
|----|---------|-------|--------|
| 30 | 232.305 | 0.943 | 38.400 |
| 40 | 280.602 | 0.901 | 44.169 |

**Table S7.** Kinetic parameters of the functional groups represented at 2960 cm<sup>−1</sup> wavenumber for different reaction models and heating rates.

| Generation models | Heating Rates (K/min) | 573.15–873.15 (K)       |                |                                       |
|-------------------|-----------------------|-------------------------|----------------|---------------------------------------|
|                   |                       | $E_{\alpha_G}$ (kJ/mol) | R <sup>2</sup> | $\ln A_{\alpha_G}$ (s <sup>−1</sup> ) |
| F1                | 20                    | 240.656                 | 0.991          | 40.341                                |
|                   | 30                    | 200.090                 | 0.995          | 33.676                                |
|                   | 40                    | 273.087                 | 0.985          | 43.788                                |
| F2                | 20                    | 342.639                 | 0.995          | 58.432                                |
|                   | 30                    | 284.388                 | 0.988          | 48.760                                |
|                   | 40                    | 390.117                 | 0.999          | 63.258                                |
| F3                | 20                    | 469.582                 | 0.970          | 80.789                                |
|                   | 30                    | 389.200                 | 0.956          | 67.363                                |
|                   | 40                    | 535.944                 | 0.980          | 87.357                                |
| D1                | 20                    | 348.910                 | 0.940          | 57.747                                |
|                   | 30                    | 292.420                 | 0.950          | 48.384                                |
|                   | 40                    | 393.690                 | 0.920          | 62.077                                |
| D2                | 20                    | 388.140                 | 0.960          | 64.028                                |
|                   | 30                    | 325.010                 | 0.970          | 53.536                                |
|                   | 40                    | 438.500                 | 0.950          | 68.852                                |
| D3                | 20                    | 438.510                 | 0.980          | 71.429                                |
|                   | 30                    | 366.760                 | 0.990          | 59.476                                |
|                   | 40                    | 496.170                 | 0.970          | 76.914                                |
| D4                | 20                    | 404.682                 | 0.968          | 65.451                                |
|                   | 30                    | 338.725                 | 0.978          | 54.479                                |
|                   | 40                    | 457.438                 | 0.956          | 70.491                                |
| A2                | 20                    | 114.425                 | 0.990          | 18.498                                |
|                   | 30                    | 94.148                  | 0.995          | 15.265                                |
|                   | 40                    | 130.263                 | 0.983          | 20.572                                |
| A3                | 20                    | 72.349                  | 0.989          | 11.004                                |
|                   | 30                    | 58.834                  | 0.994          | 8.908                                 |
|                   | 40                    | 82.655                  | 0.982          | 12.625                                |
| A4                | 20                    | 51.310                  | 0.988          | 7.144                                 |
|                   | 30                    | 41.177                  | 0.993          | 5.608                                 |
|                   | 40                    | 58.851                  | 0.979          | 8.538                                 |
| R2                | 20                    | 200.966                 | 0.970          | 32.551                                |
|                   | 30                    | 167.215                 | 0.979          | 27.040                                |
|                   | 40                    | 227.624                 | 0.958          | 35.475                                |
| R3                | 20                    | 213.353                 | 0.978          | 34.364                                |
|                   | 30                    | 177.482                 | 0.986          | 28.494                                |
|                   | 40                    | 241.805                 | 0.968          | 37.457                                |
| P2/3              | 20                    | 258.730                 | 0.939          | 42.640                                |
|                   | 30                    | 216.367                 | 0.953          | 35.673                                |
|                   | 40                    | 292.125                 | 0.922          | 46.062                                |

**Table S8.** Kinetic parameters of the functional groups represented at 3018 cm<sup>-1</sup> wavenumber for different reaction models and heating rates.

| Generation models | Heating Rates (K/min) | 573.15–873.15 (K)       |                |                                       |
|-------------------|-----------------------|-------------------------|----------------|---------------------------------------|
|                   |                       | $E_{\alpha_G}$ (kJ/mol) | R <sup>2</sup> | $\ln A_{\alpha_G}$ (s <sup>-1</sup> ) |
| F1                | 20                    | 125.085                 | 0.849          | 19.685                                |
|                   | 30                    | 110.585                 | 0.830          | 17.421                                |
|                   | 40                    | 265.209                 | 0.956          | 42.193                                |
| F2                | 20                    | 187.597                 | 0.945          | 30.942                                |
|                   | 30                    | 166.973                 | 0.933          | 27.605                                |
|                   | 40                    | 383.265                 | 0.996          | 61.703                                |
| F3                | 20                    | 266.175                 | 0.983          | 44.897                                |
|                   | 30                    | 237.902                 | 0.976          | 40.212                                |
|                   | 40                    | 530.832                 | 0.996          | 85.918                                |
| D1                | 20                    | 176.350                 | 0.730          | 27.256                                |
|                   | 30                    | 156.100                 | 0.710          | 23.989                                |
|                   | 40                    | 378.050                 | 0.870          | 59.104                                |
| D2                | 20                    | 199.310                 | 0.770          | 30.722                                |
|                   | 30                    | 176.720                 | 0.750          | 27.042                                |
|                   | 40                    | 422.590                 | 0.900          | 65.789                                |
| D3                | 20                    | 229.460                 | 0.820          | 34.625                                |
|                   | 30                    | 203.860                 | 0.800          | 30.416                                |
|                   | 40                    | 480.310                 | 0.930          | 73.796                                |
| D4                | 20                    | 209.188                 | 0.789          | 30.991                                |
|                   | 30                    | 185.616                 | 0.770          | 27.140                                |
|                   | 40                    | 441.528                 | 0.913          | 66.254                                |
| A2                | 20                    | 56.426                  | 0.818          | 7.754                                 |
|                   | 30                    | 49.111                  | 0.790          | 6.735                                 |
|                   | 40                    | 126.262                 | 0.951          | 19.748                                |
| A3                | 20                    | 33.540                  | 0.779          | 3.520                                 |
|                   | 30                    | 28.619                  | 0.738          | 2.901                                 |
|                   | 40                    | 79.946                  | 0.946          | 12.055                                |
| A4                | 20                    | 22.097                  | 0.726          | 1.246                                 |
|                   | 30                    | 18.374                  | 0.667          | 0.814                                 |
|                   | 40                    | 56.789                  | 0.940          | 8.096                                 |
| R2                | 20                    | 101.203                 | 0.777          | 14.613                                |
|                   | 30                    | 89.080                  | 0.753          | 12.764                                |
|                   | 40                    | 219.623                 | 0.915          | 33.904                                |
| R3                | 20                    | 108.613                 | 0.802          | 15.573                                |
|                   | 30                    | 95.749                  | 0.780          | 13.594                                |
|                   | 40                    | 233.815                 | 0.930          | 35.869                                |
| P2/3              | 20                    | 129.202                 | 0.718          | 19.568                                |
|                   | 30                    | 113.986                 | 0.695          | 17.180                                |
|                   | 40                    | 280.364                 | 0.869          | 3.391                                 |

**Part B**

- Kinetic models-theoretical background

According to the theory of non-isothermal pyrolysis kinetics and the guidance of ICTAC[8], the basic equations for the study of the kinetics of heterogeneous solid-state thermal decomposition can be described as follows.

$$\frac{d\alpha}{dt} \frac{dT}{dt} = \frac{d\alpha}{dT} = \frac{A}{\beta} \exp\left(-\frac{E}{RT}\right) f(\alpha) \quad (\text{B1})$$

where  $\alpha$  is the conversion rate;  $R$ , the universal gas constant,  $8.3145 \text{ J}\cdot\text{mol}^{-1}\cdot\text{K}^{-1}$ ;  $T$ , the temperature,  $\text{K}$ ;  $\beta = dT/dt$ , the heating rate,  $\text{K}\cdot\text{min}^{-1}$ ;  $E$ , the activation energy,  $\text{kJ}\cdot\text{mol}^{-1}$ ;  $A$ , the preexponential factor,  $1/\text{s}$ ;  $f(\alpha)$  is the reaction mechanism function related only to the conversion rate.

In Equation B1, the conversion rate  $\alpha$  is calculated as follows by the following equation.

$$\alpha = \frac{m_0 - m_t}{m_0 - m_\infty} \quad (\text{B2})$$

where  $m_0$ ,  $m_t$ ,  $m_\infty$  are initial mass, current mass at time  $t$ , and final mass of sample, respectively.

Depending on the fundamental equations of kinetic mentioned above, researchers have classified kinetic analysis methods into two categories: “model-fitting kinetics” and “model-free kinetics” [9]. The model-fitting method compulsorily fits the kinetic parameters into the equation, leading to the ambiguity of the kinetic interpretation [10]. In contrast, based on the conversion rate method, the model-free function method can generate unique kinetic parameters without assuming a specific reaction model [11]. Currently, isoconversional methods are more frequently employed because they do not require hypothetical reaction models and are increasingly used in oil shale thermochemical conversion studies [8]. The different forms of isoconversional methods are primarily classified as differential (Friedman) and integral ((Flynn Wall Ozawa (FWO), Kissinger Akahira Sunnose (KAS) and Starink, etc.). The present work adopts four isoconversional methods for kinetic analysis based on ICTAC guidance, as shown below [8]. The subscripts  $\alpha$  in the equations below all refer to the value related to the considered conversion rate, while  $i$  and  $j$  is introduced to denote various temperature programs. For distinguishing the product generation rate ( $\alpha_G$ ), the conversion rate ( $\alpha$ ) is replaced by  $\alpha_p$  in the text of this study.

- Differential isoconversional method
- Friedman method

The Friedman method [12] is the most straight forward and the most common differential isoconversional method to evaluate the activation energy. The equation is as follows.

$$\ln\left(\frac{d\alpha}{dt}\right) = \ln\left(\beta_i \frac{d\alpha}{dT}\right) = \ln[A_\alpha f(\alpha)] - \frac{E_\alpha}{RT_{\alpha,i}} \quad (\text{B3})$$

**The method finds the activation energy by fitting the slope of the curve of**

**$\ln\left(\beta_i \frac{d\alpha}{dT}\right)$  against  $\frac{1}{T_{\alpha,i}}$  for the same conversion rate at different heating rates.**

- Integral iso-conversional methods

The integral isoconversional method originated from the application of the principle of isoconversional functions to the integration method (B4). However, the integral in equation B4 has no analytical solution for arbitrary temperature programs. Therefore, there are many integral isoconversional methods that take an approximation to the temperature integral and obtain the general form of the Equation B5 [8].



$$g(\alpha) = \frac{A}{\beta} \int_0^T \exp\left(-\frac{E}{RT}\right) dT \quad (\text{B4})$$

$$\ln\left(\frac{\beta_i}{T_{\alpha,i}^B}\right) = \text{Const} - C \frac{E_\alpha}{RT_{\alpha,i}} \quad (\text{B5})$$

where B and C are the parameters determined by the type of the temperature integral approximation.

- Starink method

The method is a Starink method when B and C in Equation B5 are set to 1.92 and 1.0008, respectively. The method equation is shown in Equation B6 [13].

$$\ln\left(\frac{\beta_i}{T_{\alpha,i}^{1.92}}\right) = \text{Const} - 1.0008 \frac{E_\alpha}{RT_{\alpha,i}} \quad (\text{B6})$$

For a constant value of conversion rate, the plot  $\ln\left(\frac{\beta_i}{T_{\alpha,i}^{1.92}}\right)$  vs.  $\frac{1}{T_{\alpha,i}}$ , obtained from thermograms recorded at several heating rates, yield a straight line whose slope allows evaluation of the apparent activation energy.

- FWO

B=0 and C=1.052 in the FWO method and the equation is shown in B7 [14, 15].

$$\ln(\beta_i) = \text{Const} - 1.052 \frac{E_\alpha}{RT_{\alpha,i}} \quad (\text{B7})$$

Plots of  $\ln(\beta_i)$  vs.  $\frac{1}{T_{\alpha,i}}$ , at fixed value of conversion help in evaluating the activation energy from the slope of a straight-line plot.

- Vyazovkin method

The Vyazovkin equation is an exact non-linear equation used to increase the accuracy of evaluating the activation energy by the isoconversional method[8]. The Vyazovkin method is based on the following equation for the determination of activation energy value ( $E_\alpha$ ) at any particular value of  $\alpha$  which minimizes the following function[16],

$$\phi(E_\alpha) = \min \sum_i^n \sum_{j \neq i}^n \frac{I(E_\alpha, T_{\alpha,i}) \beta_j}{I(E_\alpha, T_{\alpha,j}) \beta_i} \quad (\text{B8})$$

$$I(E_\alpha, T_\alpha) = \int_0^{T_\alpha} \exp\left(-\frac{E_\alpha}{RT}\right) dT \quad (\text{B9})$$

Substituting experimental values of T and b into this equation and varying  $E_\alpha$  to reach the minimum value of this function gives the value of the activation energy at a given conversion. The values of  $I(E_\alpha, T_\alpha)$  are calculated with the help of an accurate Senum-Yang approximation [17]. The minimization procedure is repeated for each value of  $\alpha$  to find the dependence of the activation energy on the extent of conversion.

- Evaluation of reaction mechanism

The reaction mechanism is a theoretical function that describes the nature of the reaction process. It is essential to calculate the activation energy, reaction model and pre-exponential factor to get a complete reaction kinetics. This work evaluates the reac-

tion mechanism of the Jimsar oil shale pyrolysis process based on the  $Z(\alpha)$  master plot method, which are derived by combining the differential and integral forms of the reaction models [8].

$$Z(\alpha) = f(\alpha) \times g(\alpha) \quad (\text{B10})$$

$$Z(\alpha) = f(\alpha) \times g(\alpha) = \frac{d\alpha}{dT} e^{\frac{E}{RT}} \int_0^T \exp\left(-\frac{E}{RT}\right) dT \quad (\text{B11})$$

In Equation **B10** and **B11**, the algebraic expressions of  $f(\alpha)$  and  $g(\alpha)$  for considered the theoretical reaction models are given in **Table A1**. The conversion rate of 0.5 is taken as the reference point of Equation **B11** to obtain Equation **B12**.

$$\frac{Z(\alpha)}{Z(0.5)} = \frac{f(\alpha) \times g(\alpha)}{f(0.5) \times g(0.5)} = \frac{\frac{\pi(x) T_\alpha \left(\frac{d\alpha}{dt}\right)_\alpha}{\beta}}{\frac{\pi(x) T_{0.5} \left(\frac{d\alpha}{dt}\right)_{0.5}}{\beta}} \quad (\text{B12})$$

$$\pi(x) = \frac{x^3 + 18x^2 + 86x + 96}{x^4 + 20x^3 + 120x^2 + 240x + 120} \quad (\text{B13})$$

where  $x = E/RT$ .  $\pi(x)$  is obtained from the fourth basic principle of Senum-Yang, given by the equation shown in **B13** [17]. In Equation **B12**, the point  $\alpha = 0.5$  is considered as the reference point because at  $\alpha = 0.5$  the standard master plots of each considered kinetic mechanism intersect each other corresponding to value of  $\frac{Z(\alpha)}{Z(0.5)} = 1$  [18].

- Evaluation of preexponential factor

The paper seeks the preexponential factor of one of the kinetic triple factors by means of a compensating parameter approach. A significant compensation effect is observed when the model fitting method is applied to a single heating rate. Different pairs of Arrhenius parameters  $A_i$  and  $E_i$  were obtained by substituting the different Model  $f(\alpha)$  in **Table A1** into the rate equation (**B1**) and fitting it to the experimental data. Although the parameters of the chosen model  $f(\alpha)$  differed considerably, they all exhibited a strong correlation known as the compensation effect [8].

$$\ln A_i = a + bE_i \quad (\text{B14})$$

where  $a$  and  $b$  are constants (the compensation effect parameters). For each heating rate,  $\beta$ , using an integral or differential method, the pairs  $(A_i, E_i)$ , characteristic for each conversion function  $f(\alpha)$ , are determined using any form of equation (differential or integral). Using the relation of the apparent compensation effect, for each heating rate the compensation parameters are determined. Now using these compensation parameters the  $A_\alpha$  obtained at using  $E_\alpha$  values at each conversion value.

$$\ln A_\alpha = a + bE_\alpha \quad (\text{B15})$$

In the present work, the parameters  $E_\alpha$  and  $\ln A_\alpha$  obtained by the model-fitting procedure are only used here to evaluate the relationship that exists between  $E_\alpha$  and  $\ln A_\alpha$ .

## References

- [1] Baruah B, Tiwari P. Compositional and kinetic study of thermal degradation of kerogen using TG-FTIR, NMR, and microscopic study. *AIChE J.* 2022;68(1).
- [2] Khawam A, Flanagan DR. Solid-state kinetic models: Basics and mathematical fundamentals. *J. Phys. Chem. B* 2006;110(35):17315-28.
- [3] Qu BY, Li AM, Qu Y, Wang T, Zhang Y, Wang X, et al. Kinetic analysis of waste tire pyrolysis with metal oxide and zeolitic catalysts. *J. Anal. Appl. Pyrolysis* 2020;152.
- [4] Vyazovkin S, Chrissafis K, Di Lorenzo ML, Koga N, Pijolat M, Roduit B, et al. ICTAC Kinetics Committee recommendations for collecting experimental thermal analysis data for kinetic computations. *Thermochim. Acta* 2014;590:1-23.
- [5] Yan J, Jiang X, Han X, Liu J. A TG-FTIR investigation to the catalytic effect of mineral matrix in oil shale on the pyrolysis and combustion of kerogen. *Fuel* 2013;104:307-17.
- [6] Li S, Ma X, Liu G, Guo M. A TG-FTIR investigation to the co-pyrolysis of oil shale with coal. *J. Anal. Appl. Pyrolysis* 2016;120:540-8.
- [7] Wang Q, Wang YF, Zhang HX, Xu XC, Yang QK, Wang P. THE SIMULATION STUDY OF APPLICATION OF THE FG-DVC MODEL TO THE PYROLYSIS OF HUADIAN OIL SHALE OF CHINA AT DIFFERENT HEATING RATES. *Oil Shale* 2016;33(2):111-24.
- [8] Vyazovkin S, Burnham AK, Criado JM, Perez-Maqueda LA, Popescu C, Sbirrazzuoli N. ICTAC Kinetics Committee recommendations for performing kinetic computations on thermal analysis data. *Thermochim. Acta* 2011;520(1-2):1-19.
- [9] Rodante F, Vecchio S, Tomassetti M. Kinetic analysis of thermal decomposition for penicillin sodium salts: model-fitting and model-free methods. *Journal of pharmaceutical and biomedical analysis* 2002;29(6):1031-43.
- [10] Vyazovkin S, Wight CA. Model-free and model-fitting approaches to kinetic analysis of isothermal and nonisothermal data. *Thermochim. Acta* 1999;340-341(1):53-68.
- [11] Vyazovkin S. Computational aspects of kinetic analysis. Part C. The ICTAC Kinetics Project - The light at the end of the tunnel? *Thermochim. Acta* 2000;355:155-63.
- [12] Friedman HL. Kinetics of thermal degradation of char-forming plastics from thermogravimetry. Application to a phenolic plastic. *Journal of Polymer Science Part C: Polymer Symposia* 1964;6(1):183-95.
- [13] Starink MJ. The determination of activation energy from linear heating rate experiments: a comparison of the accuracy of iso-conversion methods. 2003;404(1-2):163-76.
- [14] Flynn J, Wall L. General Treatment of the Thermogravimetry of Polymers. *Journal of Research of the National Bureau of Standards Section A: Physics and Chemistry* 1966;70A.
- [15] Ozawa T. A New Method of Analyzing Thermogravimetric Data. *Bulletin of The Chemical Society of Japan - BULL CHEM SOC JPN* 1965;38:1881-6.
- [16] Vyazovkin S, Dollimore D. Linear and Nonlinear Procedures in Isoconversional Computations of the Activation Energy of Nonisothermal Reactions in Solids. *Journal of Chemical Information and Computer Sciences* 1996;36(1):42-5.
- [17] Vyazovkin S. ADVANCED ISOCONVERSIONAL METHOD Non-linear isoconversional method. 1997;49(3):1493-9.
- [18] Gotor F, Criado J, Malek J, Koga N. Kinetic Analysis of Solid-State Reactions: The Universality of Master Plots for Analyzing Isothermal and Nonisothermal Experiments. *The Journal of Physical Chemistry A* 2000;104.

**Disclaimer/Publisher's Note:** The statements, opinions and data contained in all publications are solely those of the individual author(s) and contributor(s) and not of MDPI and/or the editor(s). MDPI and/or the editor(s) disclaim responsibility for any injury to people or property resulting from any ideas, methods, instructions or products referred to in the content.
